# Supplementary material for: Biochemometry-Based Discovery of Phenylpropanoids from Azadirachta indica Fruits as Inhibitors of In Vitro Osteoclast Formation
Source: MDPI journal article supplement (doi:10.3390/molecules27113611), 2022-06-04
Supplement: s1 [file s1]

## Supporting Information

to

### **Biochemometry-based discovery of phenylpropanoids from *Azadirachta indica* fruits as *in vitro* inhibitors of osteoclast formation**

**Ammar Tahir<sup>1</sup>, Carina Kampleitner<sup>2</sup>, Theresa Wirglauer<sup>2</sup>, Ulrike Grienke<sup>1</sup>, Oskar Hoffmann<sup>2</sup>, Judith M. Rollinger<sup>1\*</sup>**

<sup>1</sup> Division of Pharmacognosy, Department of Pharmaceutical Sciences, University of Vienna, Josef-Holaubek-Platz 2, 1090 Vienna, Austria

<sup>2</sup> Division of Pharmacology and Toxicology, Department of Pharmaceutical Sciences, University of Vienna, Josef-Holaubek-Platz 2, 1090 Vienna, Austria

**\*Correspondence:** Judith M. Rollinger, e-mail: [judith.rollinger@univie.ac.at](mailto:judith.rollinger@univie.ac.at)

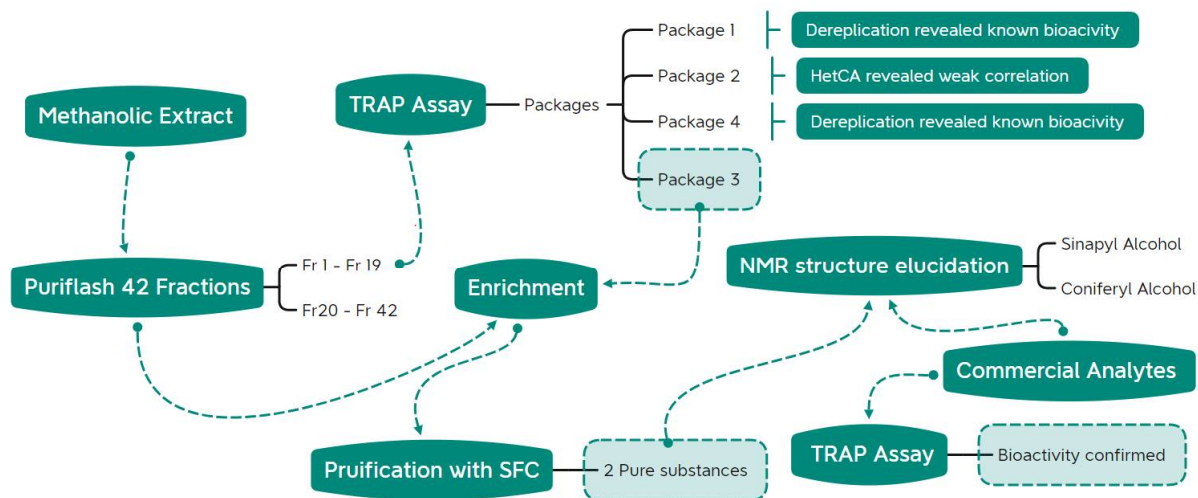

**Figure S1** Biochemometric workflow used in the study combining: 1) chemometric approaches using NMR and mass spectrometry and 2) Cell biological approaches using an osteoclast cytochemical marker (TRAP).

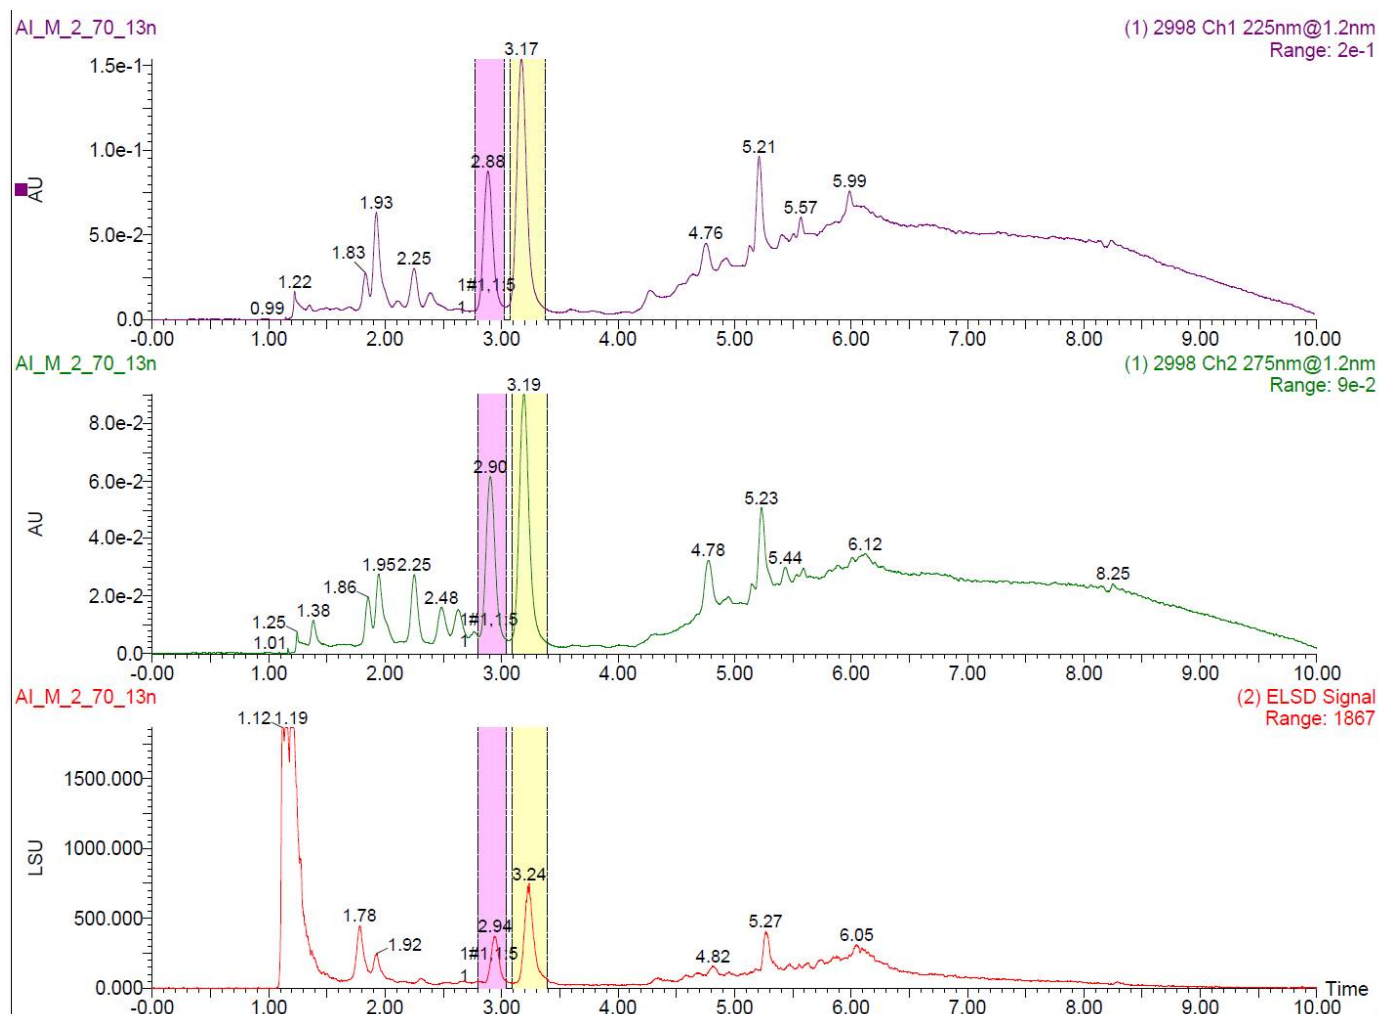

**Figure S2** Prep-SFC chromatograms showing the monitoring (ELSD in red, UV 275nm in green and UV220 in violet) and isolation windows of two potential bioactive substances (purple and yellow).

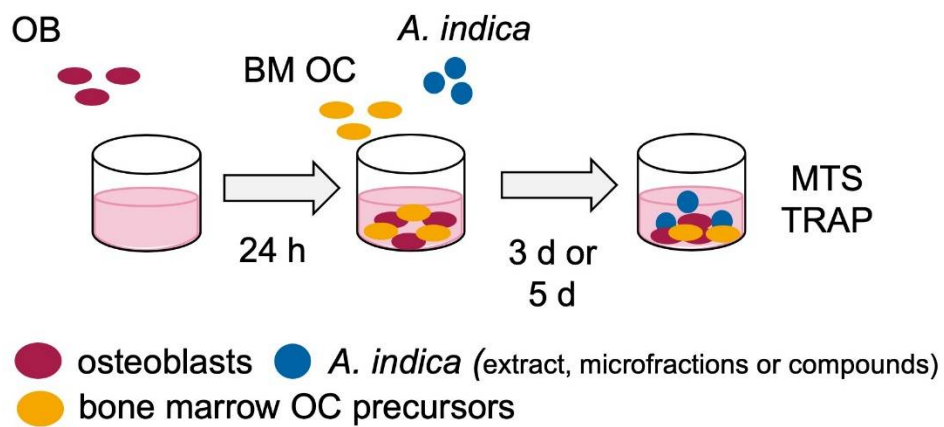

**Figure S3:** Schematic representation of the experimental design to study *A. indica* fruit extract, microfractions and compounds.
